# Supplementary material
Source: PubMed Central journal article supplement (PMC10811279)
Supplement: NIHMS1908787-supplement-1.pdf [file NIHMS1908787-supplement-1.pdf]

**Supplemental tables and figures:****Supplemental table 1.** Facility and individual trial eligibility criteria

|                                                                    | <b>HD Trial</b>                                                                                                                                                                                                                                                   | <b>METRicaL</b>                                                                                                                                                                                                                                                                                                                                                                            |
|--------------------------------------------------------------------|-------------------------------------------------------------------------------------------------------------------------------------------------------------------------------------------------------------------------------------------------------------------|--------------------------------------------------------------------------------------------------------------------------------------------------------------------------------------------------------------------------------------------------------------------------------------------------------------------------------------------------------------------------------------------|
| <b>Facility eligibility criteria</b>                               | <ul style="list-style-type: none"> <li>• Within 50 miles of a CDC reporting city</li> <li>• &gt;50 long stay residents on October 1<sup>st</sup>, 2013</li> <li>• <math>\geq</math> 80% of residents 65 years or older on October 1<sup>st</sup>, 2013</li> </ul> | <ul style="list-style-type: none"> <li>• One of four facility chains</li> <li>• No previous use of the music and memory program</li> <li>• No recent situations that might affect implementation of the intervention (e.g., bad state or federal quality assurance surveys, leadership turnover, or other competing demands)</li> <li>• <math>\geq</math> 20 eligible residents</li> </ul> |
| <b>Individual eligibility criteria (“candidate” for treatment)</b> | <ul style="list-style-type: none"> <li>• 65 Years or older</li> <li>• Long stay resident</li> <li>• No contraindications for HD vaccine</li> </ul>                                                                                                                | <ul style="list-style-type: none"> <li>• Diagnosis of Alzheimer’s disease or dementia</li> <li>• Long stay resident</li> <li>• Not hard of hearing</li> <li>• Cognitive functioning score of 3 or 4 (scale 0 to 6)</li> </ul>                                                                                                                                                              |

CDC = Centers for Disease Control and Prevention

| <b>Supplemental table 2.</b> ICD-9 and ICD-10 codes used to identify covariates in the MDS |                                                                                                                                                                                |                                                                                                                              |
|--------------------------------------------------------------------------------------------|--------------------------------------------------------------------------------------------------------------------------------------------------------------------------------|------------------------------------------------------------------------------------------------------------------------------|
| Condition                                                                                  | ICD-9                                                                                                                                                                          | ICD-10                                                                                                                       |
| Alzheimer's disease                                                                        | 331.0, 331.11, 331.19, 331.2, 331.82, 331.7, 290.0, 290.10, 290.11, 290.12, 290.13, 290.20, 290.21, 290.3, 290.40, 290.41, 290.42, 290.43, 294.10, 294.11, 294.20, 294.21, 797 | G30.9 , G31.01 , G31.09 , G31.1 , G31.83 , G94. , F03.90 , F05, F01.50 , F01.51 , F02.80 , F02.81 , F03.90 , F03.91 , R41.81 |
| Diabetes                                                                                   | 250.x                                                                                                                                                                          | E08.x, E09.x, E10.x, E11.x, E12.x                                                                                            |
| Pneumonia                                                                                  | 480, 481, 482, 485, 486, 487, 488                                                                                                                                              | J13.x, J14.x, J15.x, J16.x, J17.x, J18.x                                                                                     |
| Congestive heart failure                                                                   | 414.x                                                                                                                                                                          | I50.2, I50.3                                                                                                                 |
| Hypertension                                                                               | 401.x                                                                                                                                                                          | I10.x                                                                                                                        |
| Cirrhosis                                                                                  | 571.x                                                                                                                                                                          | K74.x                                                                                                                        |
| Renal failure                                                                              | 574.x                                                                                                                                                                          | N18.x                                                                                                                        |
| Atrial fibrillation                                                                        | 148.0, 148.1, 148.2, 148.3, 148.4, 148.91, 148.92                                                                                                                              | 148.0, 148.1, 148.2, 148.3, 148.4, 148.91, 148.92                                                                            |
| Coronary Artery Disease                                                                    | 429.2                                                                                                                                                                          | I25.x                                                                                                                        |

MDS = Minimum Data Set

**Supplementary table 3.** Fully adjusted association between facility characteristics and participation status in the HD trial. Estimates were obtained from a multinomial model and reflect the log odds of the designated status relative to being a randomized facility.

|                                                                                              | Eligible<br>non-randomized facilities |         | Ineligible facilities |         |
|----------------------------------------------------------------------------------------------|---------------------------------------|---------|-----------------------|---------|
|                                                                                              | Log-odds                              | P-value | Log-odds              | P-value |
| <b>Intercept</b>                                                                             | -5.36                                 | 0.0000  | 10.16                 | 0.0000  |
| <b>Facility measures</b>                                                                     |                                       |         |                       |         |
| Total beds                                                                                   | 0.00                                  | 0.0000  | -0.02                 | 0.0000  |
| Resource poor                                                                                | -0.33                                 | 0.1221  | 0.21                  | 0.2750  |
| For profit                                                                                   | -0.97                                 | 0.0000  | -1.31                 | 0.0000  |
| Chain facility                                                                               | -1.30                                 | 0.0000  | -1.25                 | 0.0000  |
| Alzheimer's/Dementia Unit                                                                    | -0.39                                 | 0.2149  | -0.34                 | 0.2547  |
| Any special unit                                                                             | 0.37                                  | 0.2252  | 0.18                  | 0.5361  |
| RN to nurse ratio                                                                            | -1.27                                 | 0.0000  | -0.81                 | 0.0010  |
| Direct Care hours/PPD                                                                        | -1.39                                 | 0.0000  | 1.30                  | 0.0000  |
| RN hours/PPD                                                                                 | 0.37                                  | 0.0087  | -2.34                 | 0.0000  |
| LPN hours/PPD                                                                                | 0.75                                  | 0.0000  | -1.88                 | 0.0000  |
| CNA hours/PPD                                                                                | 1.99                                  | 0.0000  | -0.47                 | 0.0000  |
| Acuity index                                                                                 | 0.15                                  | 0.0001  | -0.01                 | 0.7391  |
| Occupancy rate                                                                               | 0.00                                  | 0.3093  | -0.04                 | 0.0000  |
| 2012 mortality rate                                                                          | -0.01                                 | 0.2395  | -0.02                 | 0.0094  |
| 2012 all-cause hospitalization rate                                                          | 0.01                                  | 0.0466  | 0.02                  | 0.0071  |
| 2012 ILI hospitalization rate                                                                | 0.01                                  | 0.4602  | 0.03                  | 0.0425  |
| 2012 Influenza vaccination rate                                                              | 0.01                                  | 0.0094  | 0.00                  | 0.6183  |
| <b>Individual measures aggregated to the facility level: candidates for the intervention</b> |                                       |         |                       |         |
| Diabetes                                                                                     | -0.65                                 | 0.0569  | -0.94                 | 0.0034  |
| Alzheimer's/Dementia                                                                         | 0.05                                  | 0.9009  | -1.53                 | 0.0000  |
| Chronic kidney disease                                                                       | 0.87                                  | 0.0008  | 0.58                  | 0.0285  |

|                                                                                                  |       |        |       |        |
|--------------------------------------------------------------------------------------------------|-------|--------|-------|--------|
| Indwelling catheter                                                                              | -2.56 | 0.0000 | -1.82 | 0.0000 |
| Ventilator                                                                                       | -3.82 | 0.0000 | 5.04  | 0.0000 |
| Hypertension                                                                                     | -0.40 | 0.2339 | -1.51 | 0.0000 |
| Cirrhosis                                                                                        | -5.35 | 0.0000 | -8.53 | 0.0000 |
| Pneumonia                                                                                        | 1.78  | 0.0000 | 0.13  | 0.6383 |
| Congestive heart failure                                                                         | 0.73  | 0.0513 | 1.56  | 0.0000 |
| Candidate for intervention                                                                       | -5.36 | 0.0000 | 10.16 | 0.0000 |
| Atrial fibrillation                                                                              | -0.83 | 0.0002 | -0.65 | 0.0068 |
| Coronary artery disease                                                                          | -0.66 | 0.0250 | -0.54 | 0.0605 |
| Chemotherapy                                                                                     | 0.29  | 0.0000 | -3.87 | 0.0000 |
| Radiation                                                                                        | -0.96 | 0.0000 | -1.05 | 0.0000 |
| Dialysis                                                                                         | -3.03 | 0.0000 | -3.24 | 0.0000 |
| Age                                                                                              | 0.01  | 0.4107 | -0.08 | 0.0000 |
| Standard deviation of age                                                                        | -0.07 | 0.1074 | -0.21 | 0.0000 |
| <b>Individual measures aggregated to the facility level: non-candidates for the intervention</b> |       |        |       |        |
| Diabetes                                                                                         | 0.73  | 0.0173 | -0.14 | 0.6365 |
| Alzheimer's/Dementia                                                                             | 0.79  | 0.0341 | 0.56  | 0.1153 |
| Chronic kidney disease                                                                           | -0.92 | 0.0003 | -0.59 | 0.0180 |
| Indwelling catheter                                                                              | -1.23 | 0.0000 | -2.22 | 0.0000 |
| Ventilator                                                                                       | 0.78  | 0.0000 | 4.93  | 0.0000 |
| Hypertension                                                                                     | 0.47  | 0.1423 | 0.95  | 0.0019 |
| Cirrhosis                                                                                        | -3.36 | 0.0000 | -7.45 | 0.0000 |
| Pneumonia                                                                                        | 1.25  | 0.0000 | 0.88  | 0.0000 |
| Congestive heart failure                                                                         | 0.11  | 0.7022 | 0.29  | 0.3042 |
| Atrial fibrillation                                                                              | -0.74 | 0.0002 | -0.77 | 0.0001 |
| Coronary artery disease                                                                          | -0.58 | 0.0177 | -0.73 | 0.0027 |
| Chemotherapy                                                                                     | -3.35 | 0.0000 | -5.40 | 0.0000 |
| Radiation                                                                                        | -6.79 | 0.0000 | -4.82 | 0.0000 |
| Dialysis                                                                                         | 1.42  | 0.0000 | -0.64 | 0.0809 |
| Age                                                                                              | 0.12  | 0.0000 | 0.00  | 0.8966 |

|                           |      |        |       |        |
|---------------------------|------|--------|-------|--------|
| Standard deviation of age | 0.09 | 0.0000 | -0.03 | 0.1206 |
|---------------------------|------|--------|-------|--------|

PPD = Per patient day; RN = registered nurse; LPN = licensed practical nurse; CNA = certified nursing assistant; ILI = influenza like illness

**Supplementary table 4.** Fully adjusted association between facility characteristics and participation status in the METRICaL trial. Estimates were obtained from a multinomial model and reflect the log odds of the designated status relative to being a randomized facility.

|                                                                                              | Eligible<br>non-randomized facilities |         | Ineligible facilities |         |
|----------------------------------------------------------------------------------------------|---------------------------------------|---------|-----------------------|---------|
|                                                                                              | Log-odds                              | P-value | Log-odds              | P-value |
| <b>Intercept</b>                                                                             | 1.33                                  | 0.6029  | 6.86                  | 0.0092  |
| <b>Facility measures</b>                                                                     |                                       |         |                       |         |
| Total beds                                                                                   | 0.01                                  | 0.0867  | -0.02                 | 0.0042  |
| Resource poor                                                                                | 0.96                                  | 0.1472  | -0.40                 | 0.6307  |
| For profit                                                                                   | -3.16                                 | 0.0246  | -5.35                 | 0.0010  |
| Chain facility                                                                               | -1.74                                 | 0.0734  | 0.83                  | 0.4275  |
| Alzheimer's/Dementia Unit                                                                    | -0.29                                 | 0.8353  | -2.13                 | 0.1606  |
| Any special unit                                                                             | 0.53                                  | 0.6785  | 0.07                  | 0.9604  |
| RN to nurse ratio                                                                            | -0.74                                 | 0.7857  | -0.43                 | 0.8873  |
| Direct Care hours/PPD                                                                        | -1.98                                 | 0.0000  | 1.30                  | 0.0001  |
| RN hours/PPD                                                                                 | 1.51                                  | 0.1397  | -1.31                 | 0.2551  |
| LPN hours/PPD                                                                                | 0.98                                  | 0.3970  | -1.10                 | 0.3730  |
| CNA hours/PPD                                                                                | 2.19                                  | 0.0000  | -0.88                 | 0.0654  |
| Acuity index                                                                                 | 0.04                                  | 0.8903  | -0.22                 | 0.4204  |
| Occupancy rate                                                                               | 0.03                                  | 0.1804  | 0.04                  | 0.0370  |
| Chain                                                                                        |                                       |         |                       |         |
| Chain A                                                                                      | 0.00                                  | --      | 0.00                  | --      |
| Chain B                                                                                      | 2.95                                  | 0.0463  | 3.23                  | 0.0534  |
| Chain C                                                                                      | -0.56                                 | 0.7554  | -0.27                 | 0.8956  |
| Chain D                                                                                      | 1.83                                  | 0.2431  | 1.89                  | 0.2787  |
| <b>Individual measures aggregated to the facility level: candidates for the intervention</b> |                                       |         |                       |         |
| Diabetes                                                                                     | 2.31                                  | 0.2838  | 1.11                  | 0.5927  |
| Alzheimer's/Dementia                                                                         | 1.33                                  | 0.6029  | 6.86                  | 0.0092  |
| Chronic kidney disease                                                                       | 9.20                                  | 0.0184  | 8.76                  | 0.0254  |
| Indwelling catheter                                                                          | 2.02                                  | 0.6193  | 6.05                  | 0.1470  |

|                                                                                                  |        |        |        |        |
|--------------------------------------------------------------------------------------------------|--------|--------|--------|--------|
| Ventilator                                                                                       | 10.07  | 0.0000 | 20.91  | 0.0000 |
| Hypertension                                                                                     | 0.09   | 0.9652 | -1.57  | 0.4028 |
| Cirrhosis                                                                                        | 16.86  | 0.0000 | -6.38  | 0.0000 |
| Pneumonia                                                                                        | -4.11  | 0.2706 | -12.97 | 0.0010 |
| Congestive heart failure                                                                         | -0.87  | 0.7012 | 3.16   | 0.1308 |
| Candidate for intervention                                                                       | 1.33   | 0.6029 | 6.86   | 0.0092 |
| Atrial fibrillation                                                                              | 0.15   | 0.9708 | 5.97   | 0.1187 |
| Coronary artery disease                                                                          | 1.90   | 0.6276 | 2.41   | 0.5034 |
| Chemotherapy                                                                                     | 24.59  | 0.0000 | 11.33  | 0.0000 |
| Radiation                                                                                        | 0.00   | 1.0000 | 0.00   | #NUM!  |
| Dialysis                                                                                         | -2.37  | 0.3648 | -14.06 | 0.0000 |
| Age                                                                                              | 0.13   | 0.1381 | 0.09   | 0.3247 |
| Standard deviation of age                                                                        | 0.16   | 0.2138 | -0.05  | 0.6936 |
| <b>Individual measures aggregated to the facility level: non-candidates for the intervention</b> |        |        |        |        |
| Diabetes                                                                                         | -3.36  | 0.2424 | -1.40  | 0.6004 |
| Alzheimer's/Dementia                                                                             | 2.57   | 0.3299 | 2.33   | 0.3774 |
| Chronic kidney disease                                                                           | -3.87  | 0.2277 | -4.06  | 0.2357 |
| Indwelling catheter                                                                              | -1.69  | 0.7108 | -10.45 | 0.0267 |
| Ventilator                                                                                       | -97.59 | 0.0000 | 38.36  | 0.0000 |
| Hypertension                                                                                     | -1.25  | 0.6457 | -0.76  | 0.7706 |
| Cirrhosis                                                                                        | 0.04   | 0.8837 | 2.94   | 0.0000 |
| Pneumonia                                                                                        | -19.48 | 0.0000 | -2.44  | 0.0232 |
| Congestive heart failure                                                                         | -4.16  | 0.1553 | -1.98  | 0.4408 |
| Atrial fibrillation                                                                              | 11.21  | 0.0002 | 4.03   | 0.1534 |
| Coronary artery disease                                                                          | 3.93   | 0.2839 | 1.66   | 0.6521 |
| Chemotherapy                                                                                     | -69.30 | 0.0000 | -54.67 | 0.0000 |
| Radiation                                                                                        | 29.60  | 0.0000 | -35.62 | 0.0000 |
| Dialysis                                                                                         | 9.93   | 0.0380 | 8.51   | 0.0000 |
| Age                                                                                              | -0.18  | 0.0363 | -0.29  | 0.0017 |
| Standard deviation of age                                                                        | -0.17  | 0.2567 | -0.19  | 0.1704 |

PPD = Per patient day; RN = registered nurse; LPN = licensed practical nurse; CNA = certified nursing assistant; ILI = influenza like illness



**Supplemental figure 1. Standardized mean difference of individual level characteristics between individuals who are candidates for treatment residing in randomized and eligible non-randomized nursing homes**

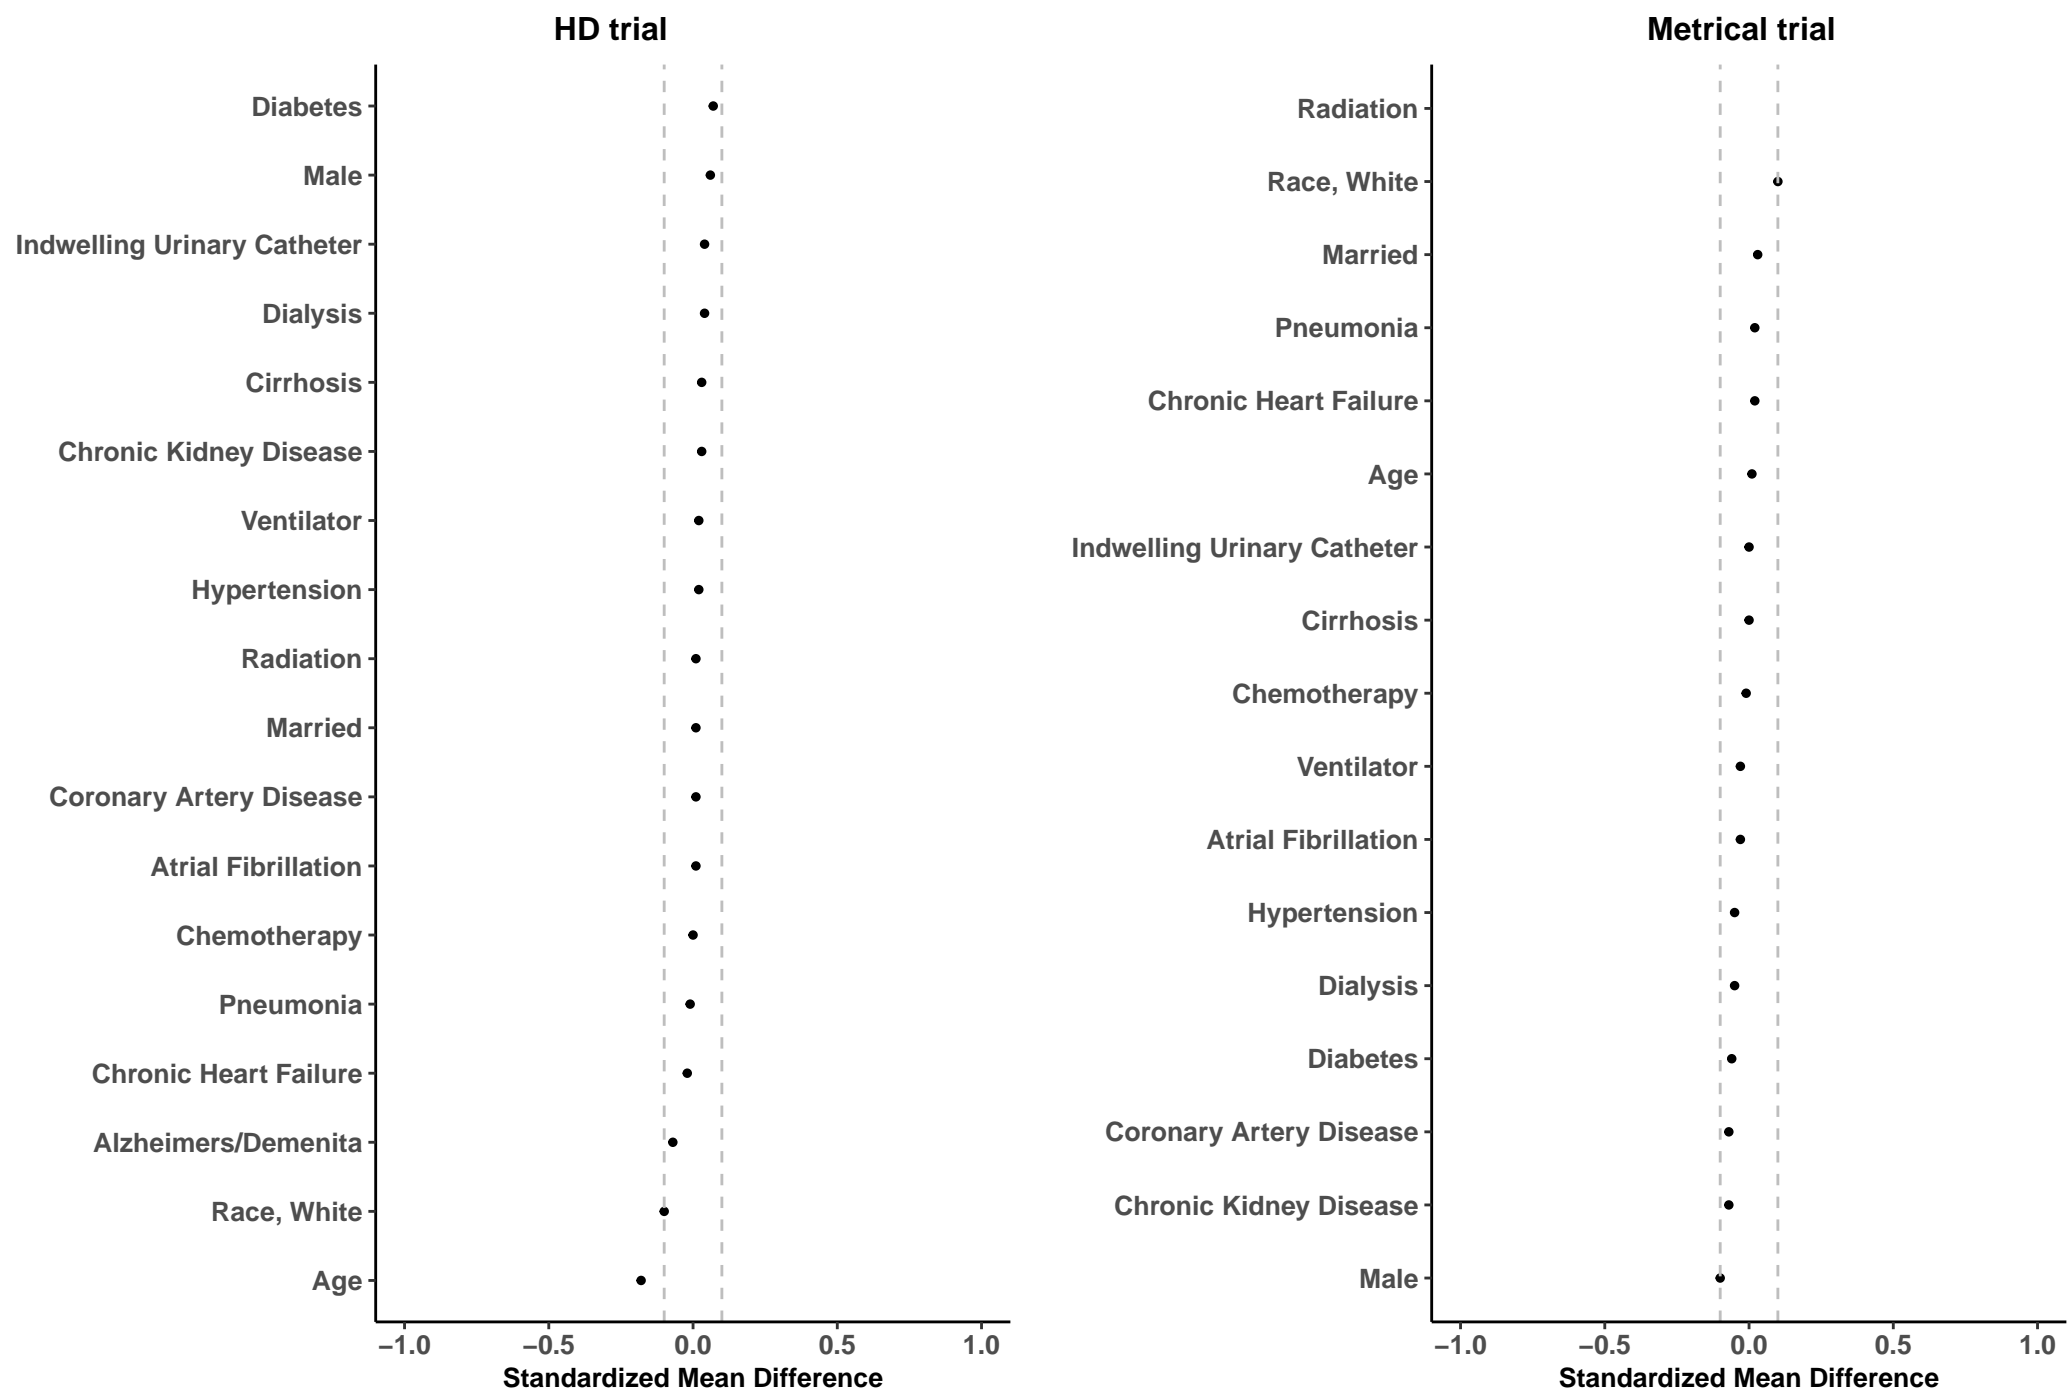

**Supplemental figure 2. Standardized mean difference of individual level characteristics between individuals who are not candidates for treatment residing in randomized and eligible non-randomized nursing homes**

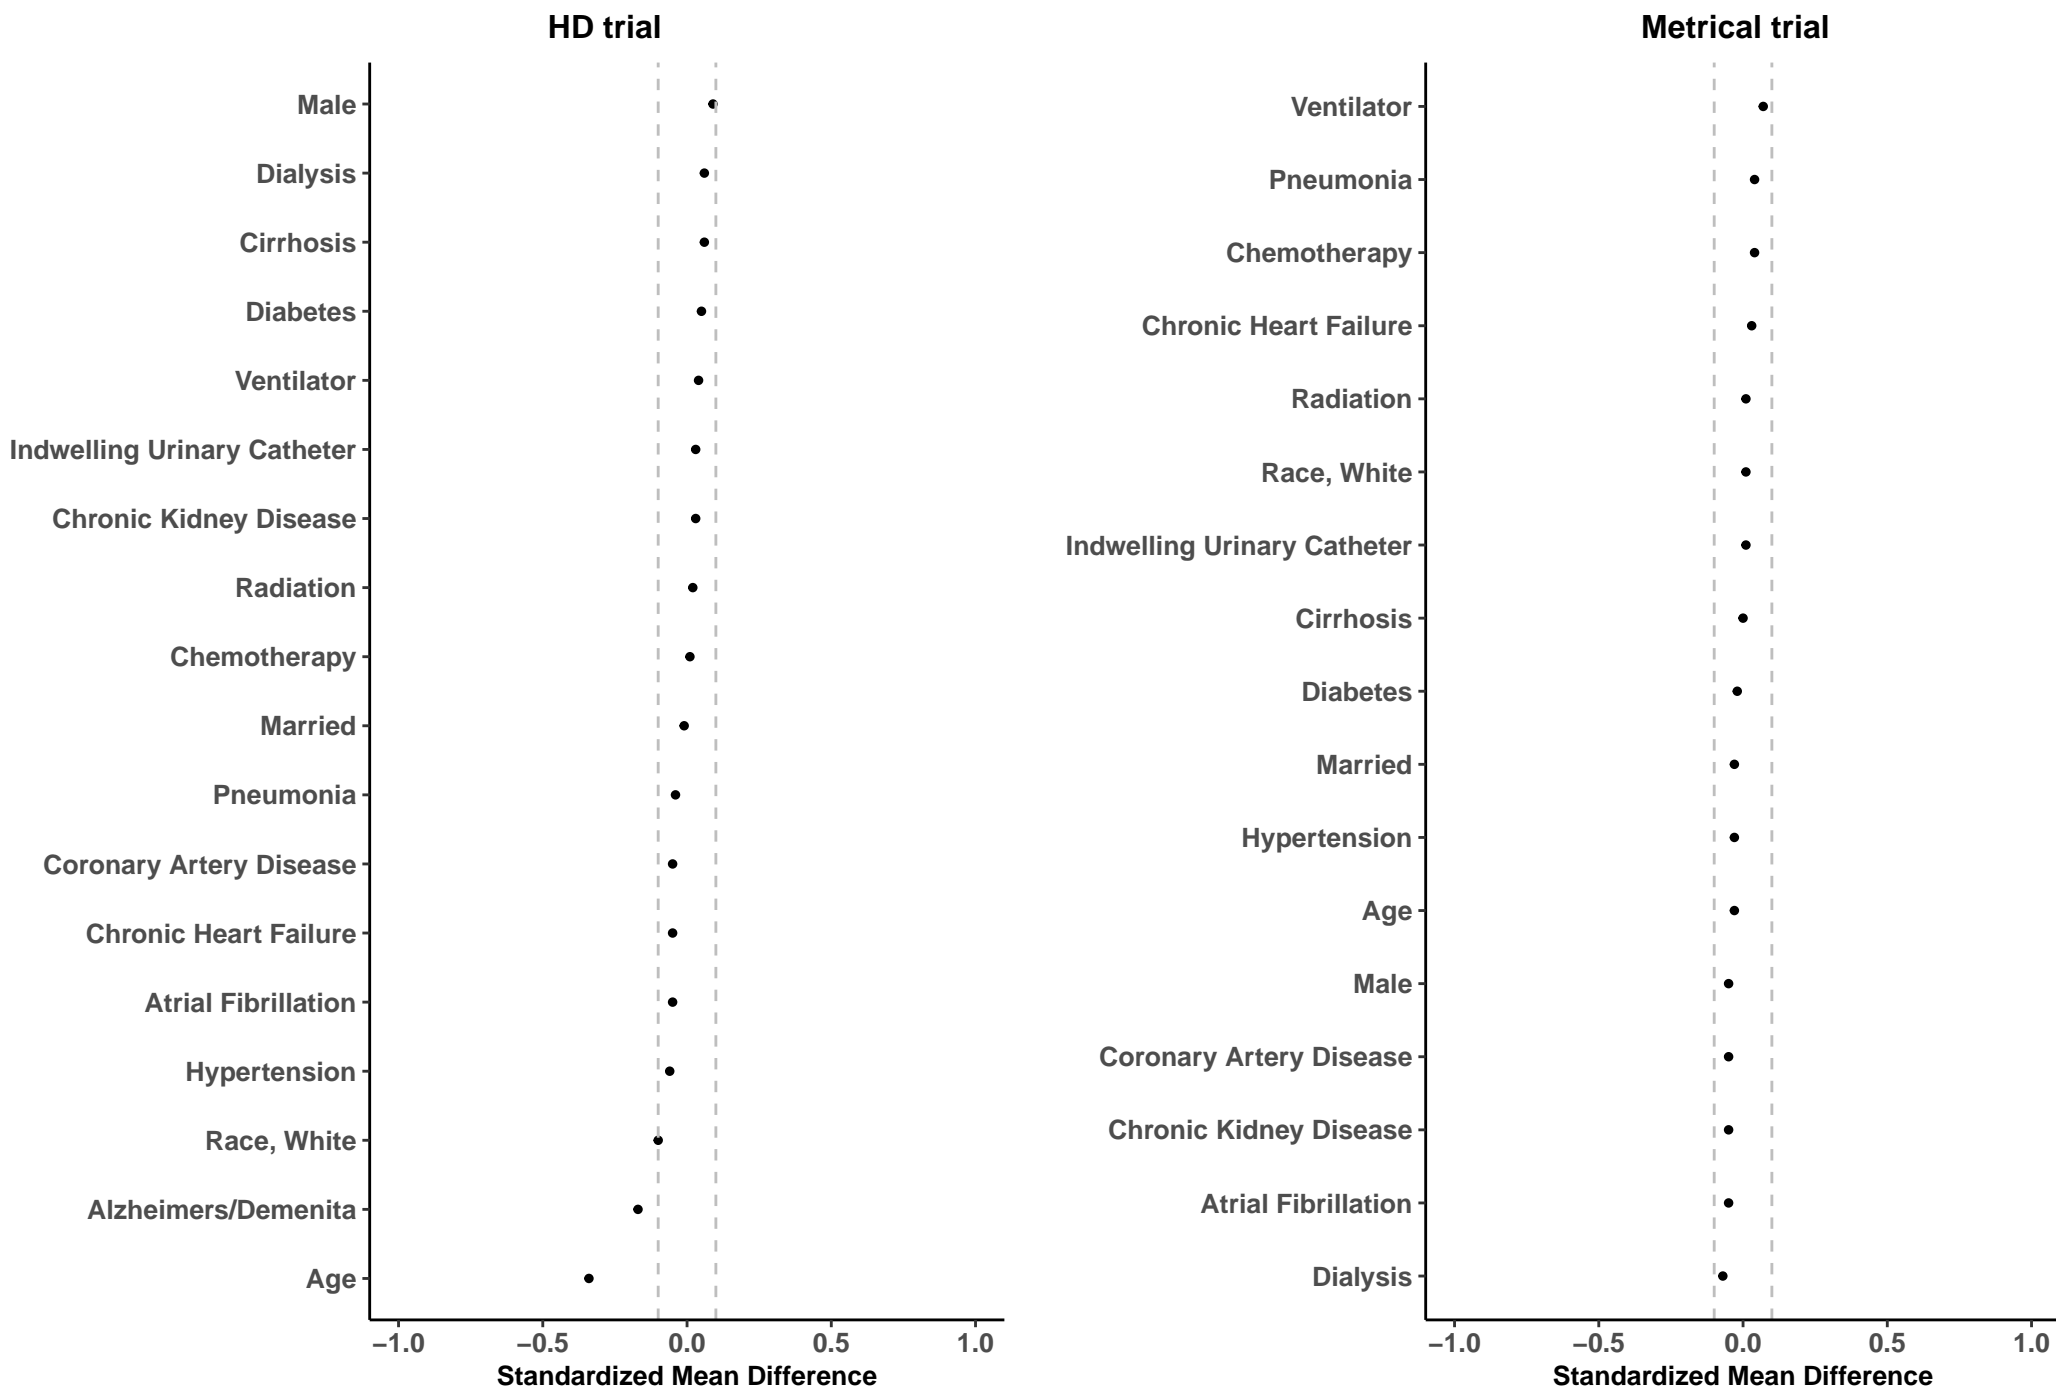

**Supplemental figure 3. Standardized mean difference of individual level characteristics between individuals who are candidates for treatment residing in randomized and ineligible nursing homes**

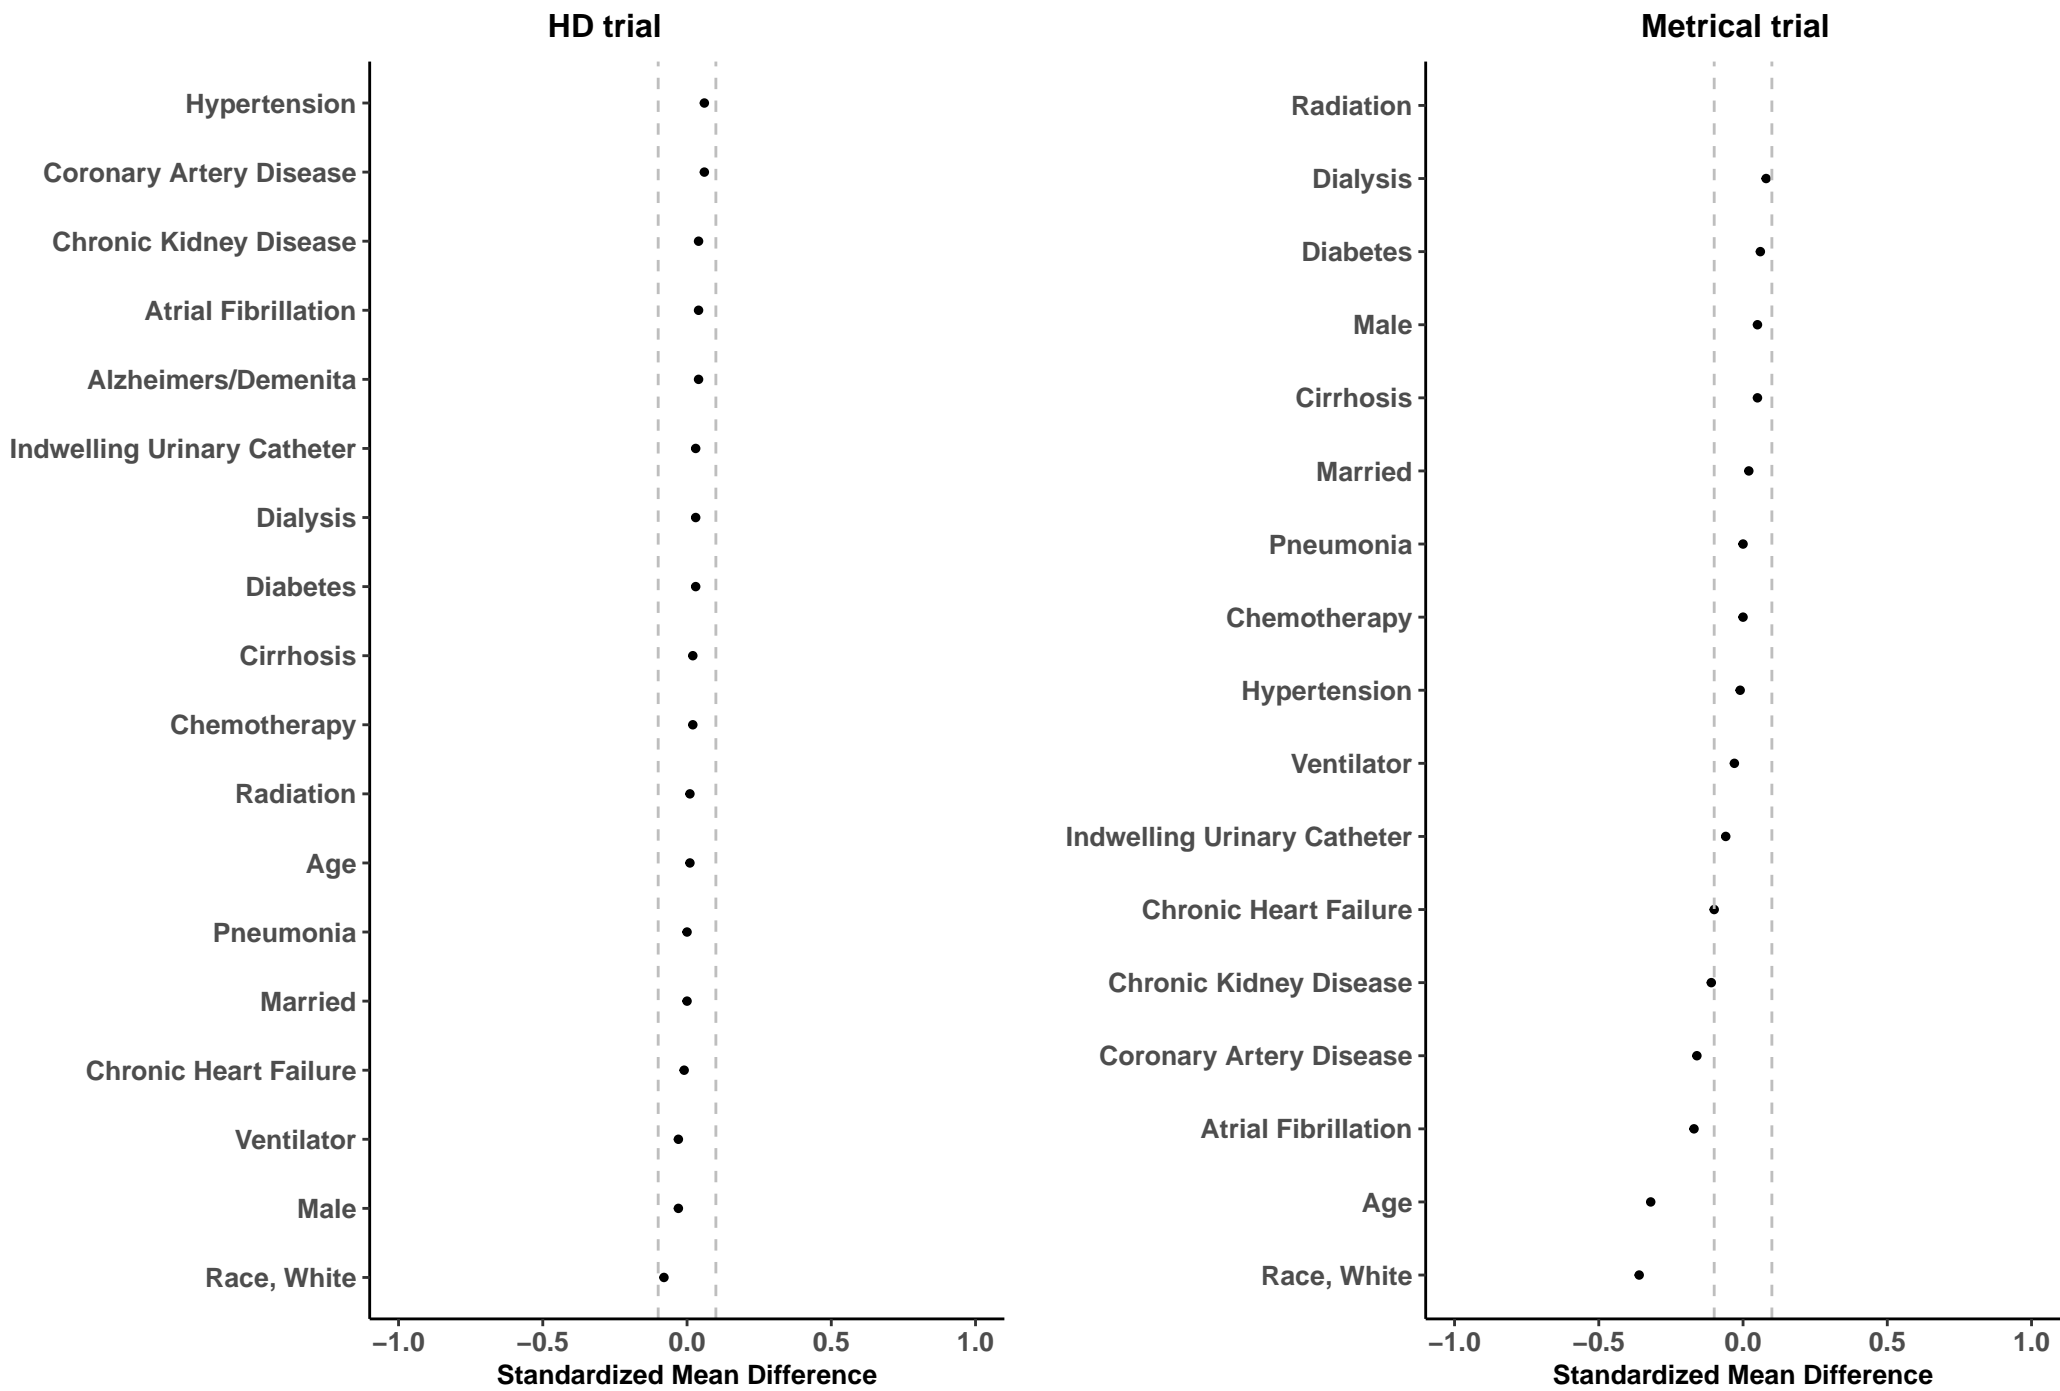

Supplemental figure 4. Standardized mean difference of individual level characteristics between individuals who are not candidates for treatment residing in randomized and ineligible nursing homes

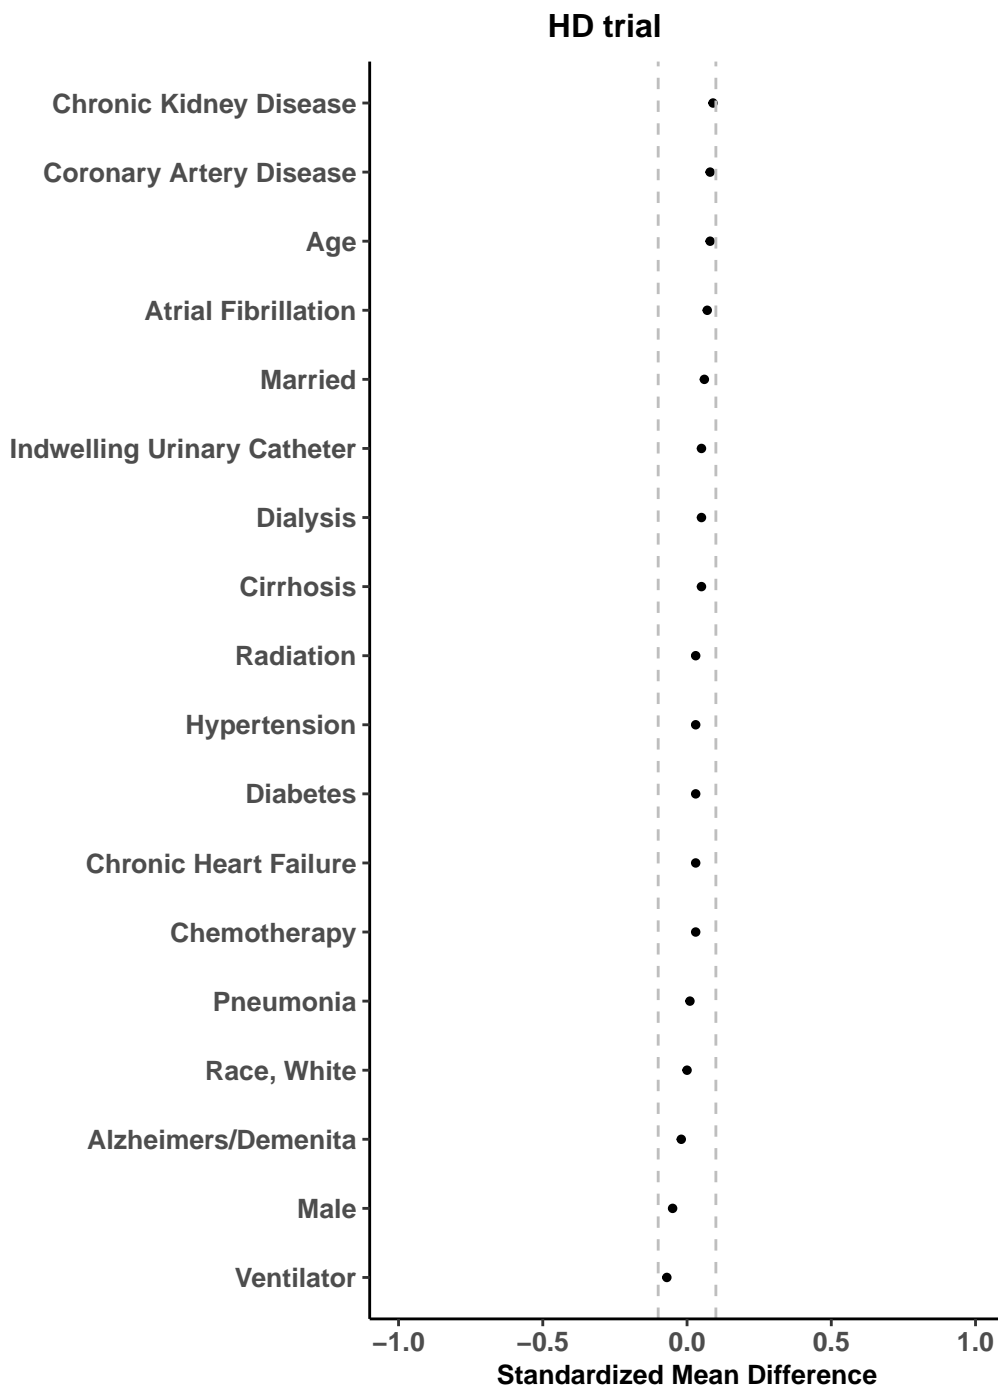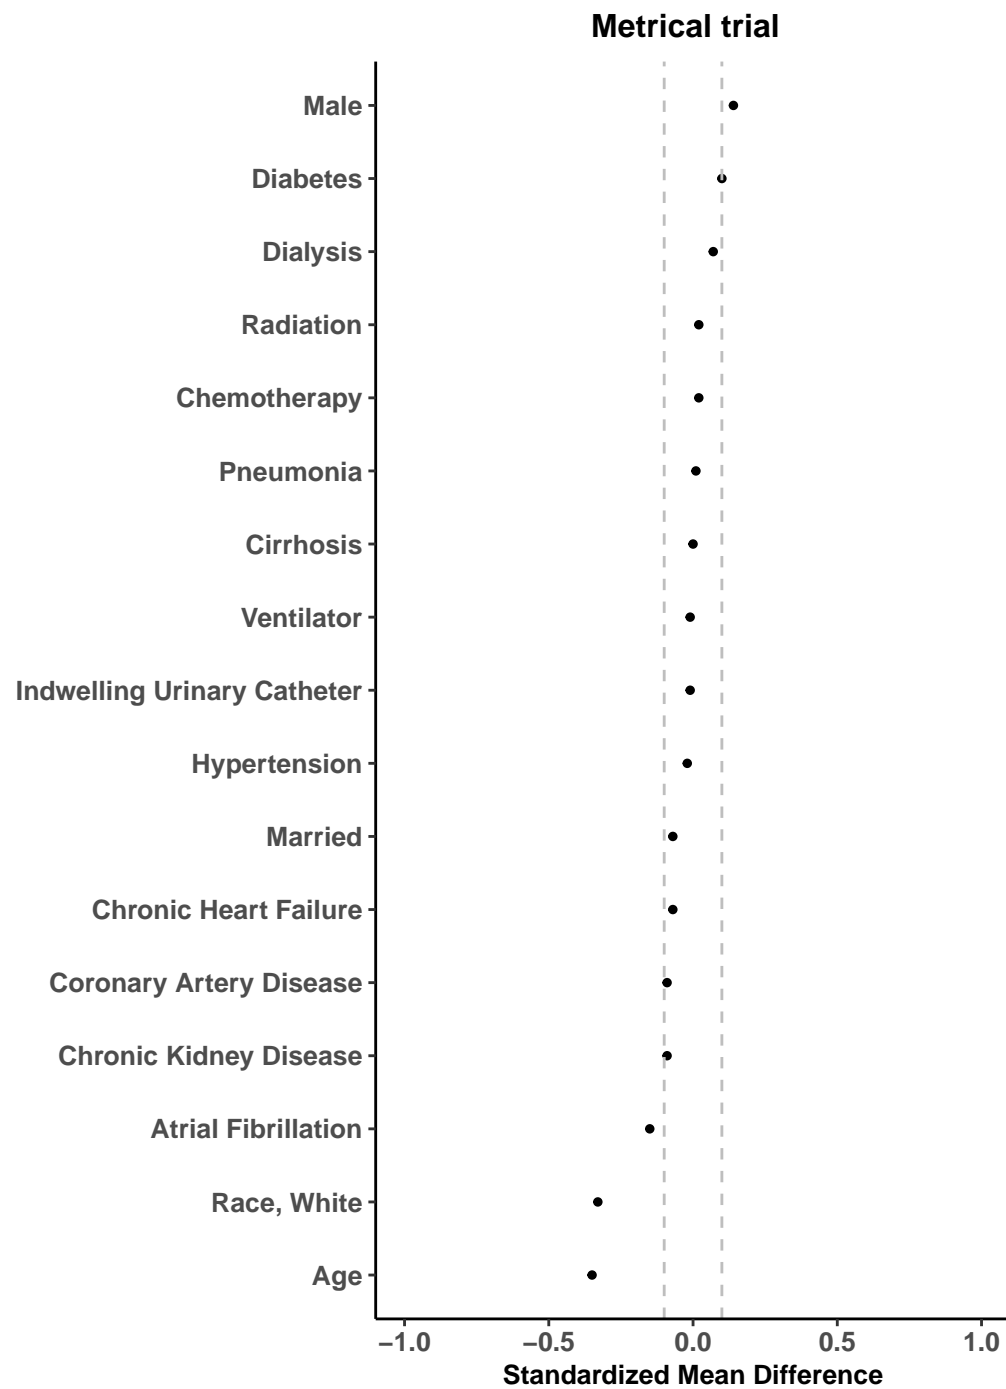

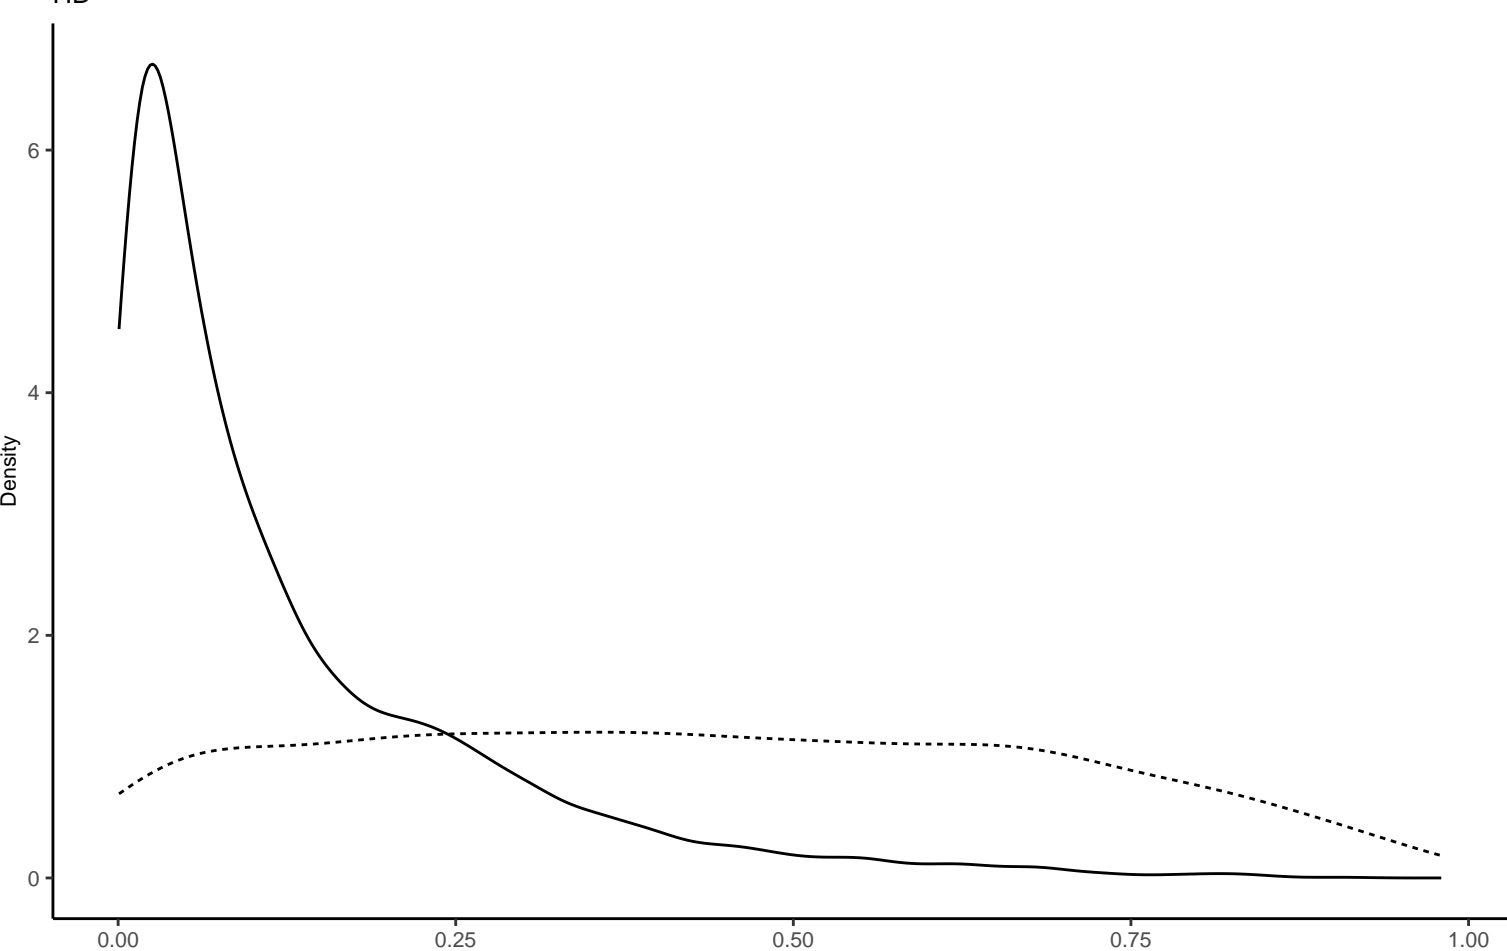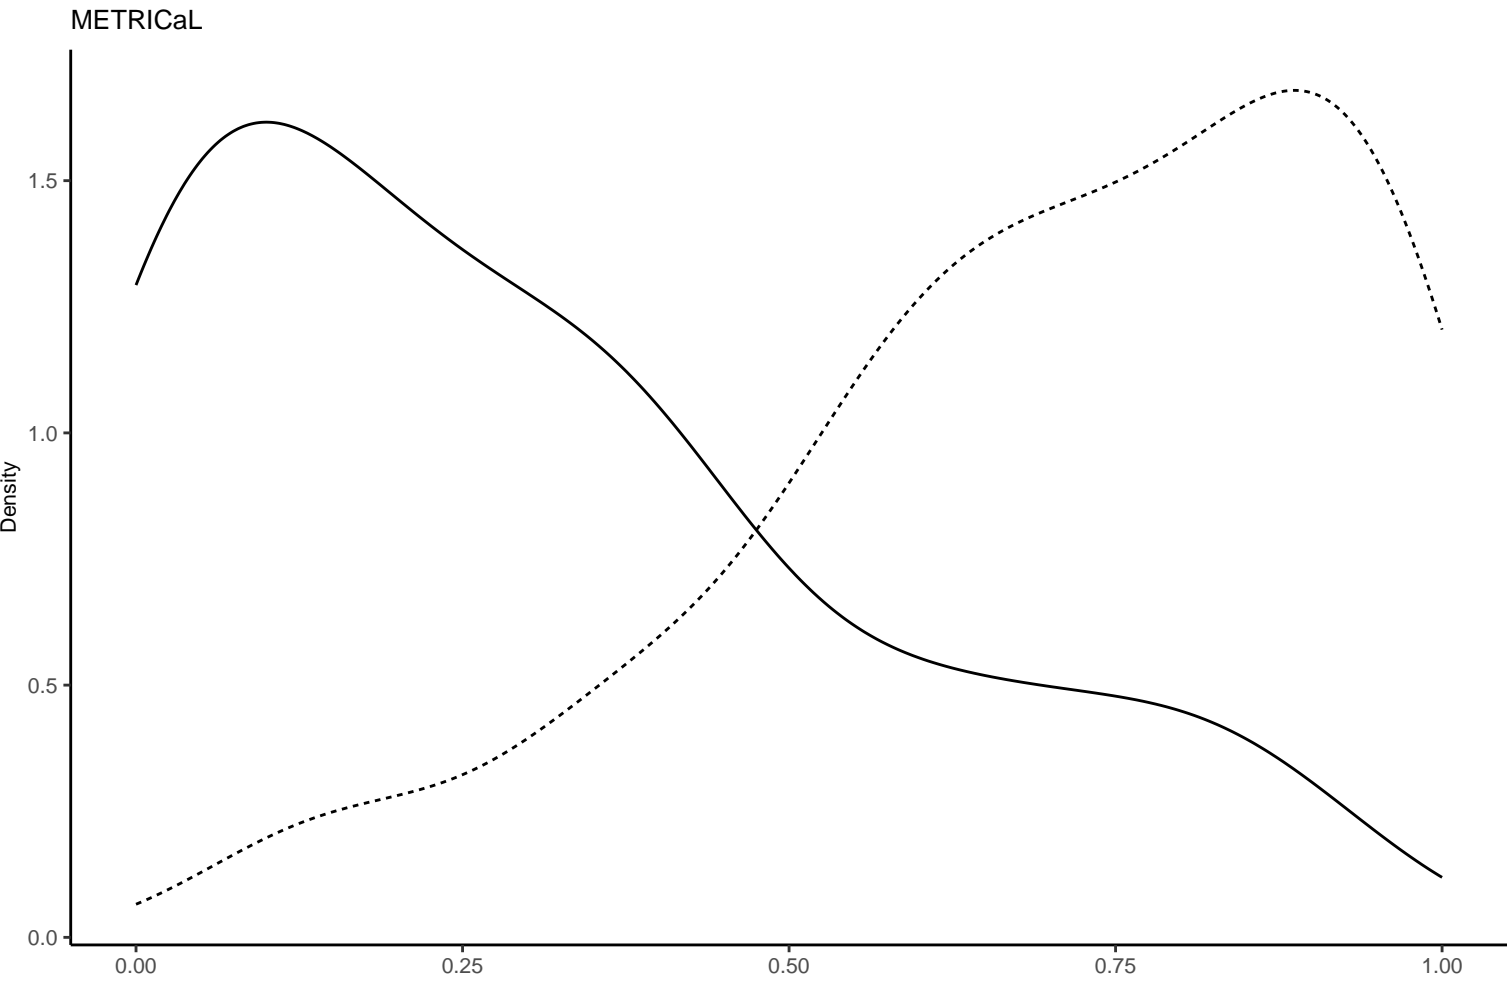

— Eligible, non-randomized facilities    - - - - Randomized facilities

|                    |                                                                                                                                                                                                                                                                                                                                                                                                                                                                                                                                                                                                                                                                                                                                                                                                                                                                                                                                                                                                                                                                                                                                                         |
|--------------------|---------------------------------------------------------------------------------------------------------------------------------------------------------------------------------------------------------------------------------------------------------------------------------------------------------------------------------------------------------------------------------------------------------------------------------------------------------------------------------------------------------------------------------------------------------------------------------------------------------------------------------------------------------------------------------------------------------------------------------------------------------------------------------------------------------------------------------------------------------------------------------------------------------------------------------------------------------------------------------------------------------------------------------------------------------------------------------------------------------------------------------------------------------|
|                    | <p>Title: Assessing the representativeness of cluster randomized trials: Evidence from two large pragmatic trials in United States nursing homes</p> <p>Manuscript ID: CT-22-0242.R1</p> <p>Funding Information: U.S. Department of Health and Human Services &gt; U.S. Public Health Service &gt; <b>Agency for Healthcare Research and Quality</b> K12 HS022998-03</p> <p>U.S. Department of Health and Human Services &gt; National Institutes of Health &gt; <b>National Institute on Aging</b> R33AG057451</p> <p><b>Patient-Centered Outcomes Research Institute</b> ME-1502-27794 ME-2021C2-22365</p> <p><b>Sanofi</b></p> <p>U.S. Department of Health and Human Services &gt; National Institutes of Health &gt; <b>U.S. National Library of Medicine</b> R01LM013616</p>                                                                                                                                                                                                                                                                                                                                                                      |
| Submitting Author: | <div data-bbox="1709 922 1877 1008" style="text-align: right;"> <input checked="" type="checkbox"/> <a href="#">joyce, nina (proxy)</a> </div> <div data-bbox="764 993 1062 1040" style="text-align: center;"> <input type="text" value="joyce, nina"/> </div> <hr/> <p><i>primary affiliation</i></p> <ul style="list-style-type: none"> <li>▪ Brown University Public Health Program<br/>121 south main st. Providence Rhode Island 02912<br/>United States</li> </ul> <p>Authors &amp; Institutions:</p> <div style="display: flex; justify-content: space-between;"> <div data-bbox="338 1273 831 1393"> <p> <a href="#">joyce, nina proxy</a></p> <p> <a href="https://orcid.org/0000-0001-7611-5494">https://orcid.org/0000-0001-7611-5494</a> ✓</p> </div> <div data-bbox="905 1273 1598 1354"> <ul style="list-style-type: none"> <li>▪ Brown University School of Public Health ✓ - Epidemiology<br/>Providence, Rhode Island<br/>United States</li> </ul> </div> </div> |

 [Robertson, Sarah E proxy](#)

Brown University School of Public Health ✓ - Center for Gerontology and Healthcare Research  
Providence, Rhode Island  
United States

• Harvard University T H Chan School of Public Health ✓ - epidemiology  
Boston, Massachusetts  
United States

Harvard University T H Chan School of Public Health ✓ - biostatistics  
Boston, Massachusetts  
United States

Harvard University T H Chan School of Public Health ✓ - CAUSALab  
Boston, Massachusetts  
United States

Brown University School of Public Health ✓ - Health Services Policy and Practice  
Providence, Rhode Island  
United States

 [Mcreeedy, Ellen proxy](#)

• Brown University School of Public Health ✓ - Center for Gerontology and Healthcare Research  
Providence, Rhode Island  
United States

Brown University School of Public Health ✓ - Health Services Policy and Practice  
Providence, Rhode Island  
United States

 [Ogarek, Jessica proxy](#)

• Brown University School of Public Health ✓ - Center for Gerontology & Healthcare Research  
Providence, Rhode Island  
United States

 [Davidson, H. E. proxy](#)

• Insight Therapeutics LLC  
Norfolk, Virginia  
United States

 [Mor, Vincent proxy](#)

• Brown University School of Public Health ✓ - Health Services, Policy and Practice  
Providence, Rhode Island  
United States

Brown University School of Public Health ✓ - Center for Gerontology and Healthcare Research  
Providence, Rhode Island  
United States

 [Gravenstein, Stefan proxy](#)

• Brown University School of Public Health ✓ - Center for Gerontology and Healthcare Research

 [Dahabreh, Issa J proxy](#)

Providence, Rhode Island  
United States

Brown University School of Public Health ✓ - Health Services Policy and Practice  
Providence, Rhode Island  
United States

Harvard University T H Chan School of Public Health ✓ - epidemiology  
Boston, Massachusetts  
United States

Harvard University T H Chan School of Public Health ✓ - Biostatistics  
Boston, Massachusetts  
United States

Harvard University T H Chan School of Public Health ✓ - CAUSALab  
Boston, Massachusetts  
United States

Contact Author (populate the ##PROLE\_AUTHOR...## e-mail tags):

joyce, nina

Current Contact Author:  Sa joyce, nina ([proxy](#))

Running Head: Representativeness of cluster randomized trials

Keywords: nursing home ✳, medicare ✳, generalizability ✳, influenza ✳, dementia ✳
